# Supplementary material for: β-Catenin recognizes a specific RNA motif in the cyclooxygenase-2 mRNA 3′-UTR and interacts with HuR in colon cancer cells
Source: PubMed Central journal article supplement — Nucleic Acids Res. 2012 Apr 27;40(14):6863–72. doi: 10.1093/nar/gks331 (PMC3413138; doi:10.1093/nar/gks331), 2012-04-27
Supplement: supp_gks331_nar-00247-r-2012-File007.pdf [file supp_gks331_nar-00247-r-2012-File007.pdf]

**A**

dG = -20.40 [Initially -20.40]

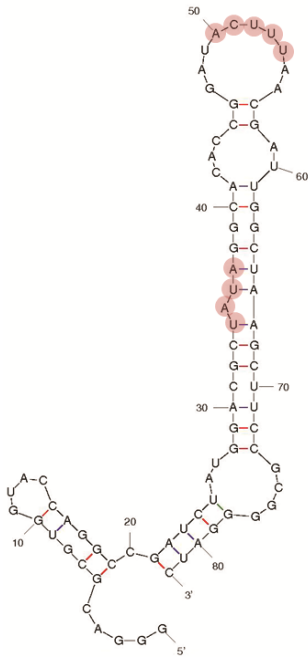**B**

dG = -19.60 [Initially -19.60]

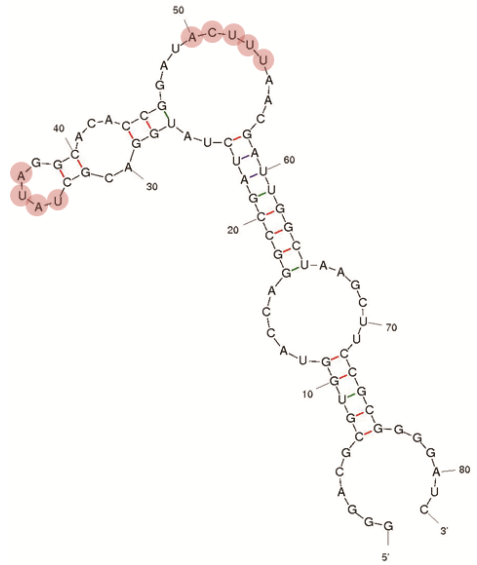

**Supplementary Figure 1. mFOLD prediction of RNA aptamer.** (A and B) Nucleotides for the putative  $\beta$ -catenin binding sites are shaded.

**A**

**U-1 (150 nt):**

AAGUCUAAUG AUCAU**AUUUA** **UUUAUUUA**UA UGAACCAUGU CUAUUA**AUUU** **AUUUAUUUA** UAAU**AUUUA**U AUUAAACUCC  
 UUAUGUUACU UAACAUCUUC UGUAACAGAA GUCAGUACUC CUGUUGCGGA GAAAGGAGUC AUACUUGUGA

**U-2 (188 nt):**

AAGUCUAAUG AUCAU**AUUUA** **UUUAUUUA**UA UGAACCAUGU CUAUUA**AUUU** **AUUUAUUUA** UAAU**AUUUA**U AUUAAACUCC  
 UUAUGUUACU UAACAUCUUC UGUAACAGAA GUCAGUACUC CUGUUGCGGA GAAAGGAGUC AUACUUGUGA AGAC**UUUU**AU  
 GUCACUACUC UAAAGA**UUUU** GCUGUUGC

**U-3 (202 nt):**

GCGGAGAAAAG GAGUCAUACU UGUGAA**ACU** **UUU**AUGUCAC UACUCUAAAAG **AUUUU**GCUGU UGCUGUUAAG UUUGGAAAAC  
 AG**UUUUU**AUU CUG**UUUU**AUA AACCAAGAGAG AAAUGAG**UUU** **UG**ACGUC**UUU** **UU**ACUUGAAU UUCAACUUAU AUUUAAGGA  
 CGAAAGUAAA GAUGUUUGAA UACUUAAACA CUAUCACAAG AUGCCAA

**U-4 (100 nt):**

UGUAAACAGAA GUCAGUACUC CUGUUGCGGA GAAAGGAGUC AUACUUGUGA AG**UUUU**AU GUCACUACUC UAAAGA**UUUU**  
 GCUGUUGCUG UUAAGUUUGG

**Negative Control (NC, 80 nt):**

CAUAGCUCAU UAUACCCUCC UGGGCUCAAG CAAUCCCCU AACUCUGCCU CCCAGUAGC UAGGACCACA GGCAUACACC

**Coding Region (CR, 200nt):**

AGTCAAAGAT ACTCAGGCAG AGATGATCTA CCCTCCTCAA GTCCTGAGC ATCTACGGTT TGCTGTGGGG CAGGAGGTCT  
 TTGGTCTGGT GCCTGGTCTG ATGATGTATG CCACAATCTG GCTGAGGGAA CACAACAGAG TATGCGATGT GCTTAAACAG  
 GAGCATCCTG AATGGGGTGA TGAGCAGTTG TTCCAGACAA

**GAPDH 3'UTR (GAPDH, 201 nt):**

AGACCCCTGG ACCACCAGCC CCAGCAAGAG CACAAGAGGA AGAGAGAGAC CCTCACTGCT GGGGAGTCCC TGCCACACTC  
 AGTCCCCCAC CACACTGAAT CTCCCCTCCT CACAGTTGCC ATGTAGACCC CTTGAAGAGG GGAGGGGCCT AGGGAGCCGC  
 ACCTGTGCAT GTACCATCAA TAAAGTACCC TGTGCTCAAC C

**B**

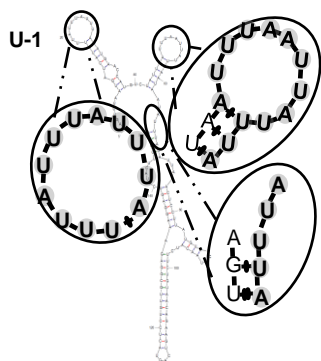

**C**

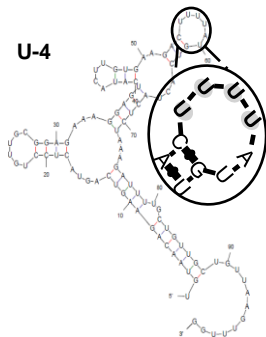

**D**

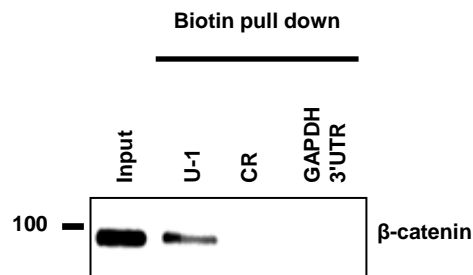

**Supplementary Figure 2. Sequence and predicted structure of COX-2 3'UTR fragments.** (A) Sequences of the COX-2 3'UTR fragments, **negative control for SPR**, coding region of COX-2 mRNA and a GAPDH mRNA 3'UTR. AU-rich elements (Bold) and β-catenin binding elements (Box) are indicated. (B) Predicted secondary structure of the U-1 fragment using the mFold program. (C) Predicted secondary structure of the U-4 fragment using the mFold program. (D) Biotin pull-down analysis of U-1 and negative control RNAs such as a coding region of COX-2 mRNA (CR) and GAPDH mRNA 3'UTR (GAPDH) using HT-29 colon adenocarcinoma cell extracts. RNA bound pellet fractions were detected by Western blot analysis with anti-β-catenin antibody. Input (10%) was also loaded.

A

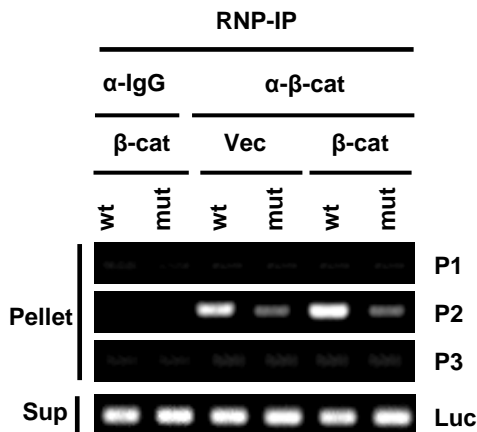

B

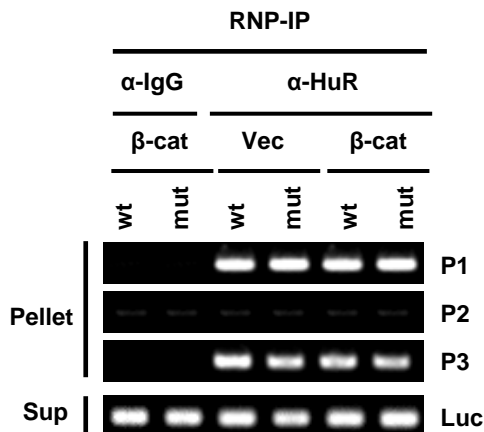

C

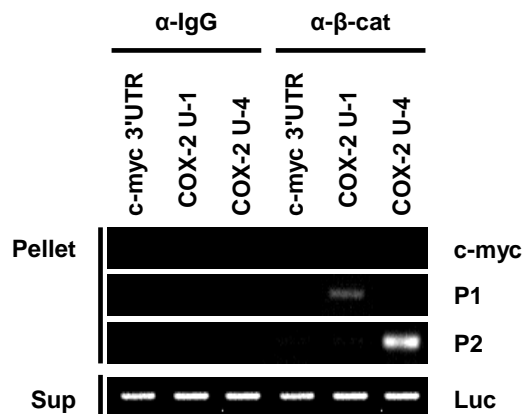

D

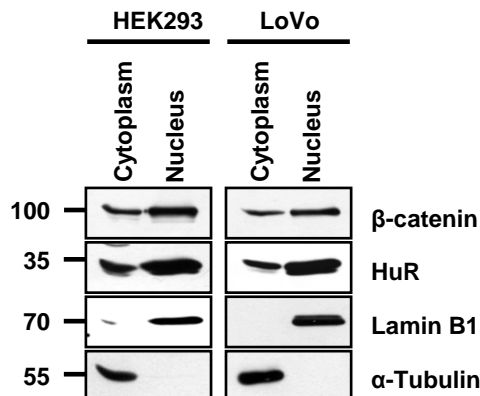

**Supplementary Figure 3. Specific binding and collaboration of  $\beta$ -catenin and HuR on COX-2 3'UTR.** (A) RNP-IP analysis with anti- $\beta$ -catenin antibody to test for its binding to wild-type (wt) or mutant (mut) COX-2 3'UTR downstream of the luciferase gene. HEK293T cells were co-transfected either with the vector (Vec) or with 3x Flag-tagged  $\beta$ -catenin in the presence of the wt or mut luciferase reporter. Pellet RNA was analyzed using P1, P2 or P3 primers (as shown in Figure 4A) to test for the binding of the protein to specific sites in COX-2 3'UTR. Expression of the luciferase gene (Luc) in the supernatant (Sup) RNA was analyzed relative to the control. PCR primers are indicated on the right side of the gel. (B) RNP-IP analysis with anti-HuR antibody to test for its binding to wild-type (wt) or mutant (mut) COX-2 3'UTR downstream of the luciferase gene. Analysis was performed as described in (A). (C) RNP-IP with the anti- $\beta$ -catenin antibody. U-4 and U-1 fragments of COX-2 3'UTR were expressed in LoVo cells. The c-myc 3'UTR downstream of the luciferase gene was expressed as a negative control for  $\beta$ -catenin binding. Analysis was performed as described in (A). (D) Western blot analysis of the subcellular fractionated extracts of HEK293 and LoVo cells. Cytoplasmic and nuclear fractions were prepared as described in the Materials and Methods. Protein levels of the  $\beta$ -catenin and HuR protein were detected along with the cytoplasmic marker ( $\alpha$ -Tubulin) and nuclear marker (Lamin B1). Protein size markers are shown on the left side of the gel.

**Supplementary Table 1. Sequence of the Oligonucleotides for generation of Plasmids, RT-PCR, site-directed mutagenesis and siRNA.**

| Assay                     | PCR primer name           | F/R                                | sequence                                             |
|---------------------------|---------------------------|------------------------------------|------------------------------------------------------|
| In vitro transcription    | T7 promoter sequence (T7) |                                    | TAA TAC GAC TCA CTA TAG GG                           |
|                           | U-1                       | Forward                            | (T7)-AAG TCT AAT GAT CAT ATT                         |
|                           |                           | Reverse                            | TCA CAA GTA TGA CTC CTT                              |
|                           | U-2                       | Forward                            | (T7)-AAG TCT AAT GAT CAT ATT                         |
|                           |                           | Reverse                            | GCA ACA GCA AAA TCT TTA                              |
| U-3                       | Forward                   | (T7)-CGG AGA AAG GAG TCA TAC       |                                                      |
|                           | Reverse                   | CAT CTT GTG ATA                    |                                                      |
| U-4                       | Forward                   | (T7)-TGT AAC AGA AGT CAG TAC       |                                                      |
|                           | Reverse                   | TGT AAC AGA AGT CAG TAC            |                                                      |
| RT-PCR and qRT-PCR        | P1                        | Forward                            | GCT CTA GAA AGT CTA ATG ATC ATA TT                   |
|                           |                           | Reverse                            | AGT CTA GAT CAC AAG TAT GAC TCC TT                   |
|                           | P2                        | Forward                            | AGT CTA GAT GTA ACA GAA GTC AGT AC                   |
|                           |                           | Reverse                            | AGT CTA GAC CAA ACT TAA CAG CAA CA                   |
|                           | P3                        | Forward                            | CAT CTA GAA TGA CCT CAT AAA ATA CC                   |
| Reverse                   |                           | GAT CTA GAG TCT CTT AGC AAA ATG GC |                                                      |
|                           | c-myc                     | Forward                            | CGA GAT CTT TTT ATG CTT ACC ATC TTT TTT TTT TC       |
|                           |                           | Reverse                            | CGA GAT CTG AAA CAT TGT GTA AAT CTT AAA ATT TT       |
| siRNA                     | β-catenin<br>HuR          | sense                              | AGC UGA UAU UGA UGG ACA Gtt                          |
|                           |                           | sense                              | GCC UGU UCA GCA GCA UUG Gtt                          |
| plasmid                   | PCR primer name           | F/R                                | sequence                                             |
| For recombinant protein   | Arm                       | Forward                            | TGC GGA TCC CAC AGA TGC TGA AAC AT                   |
|                           |                           | Reverse                            | GCG AAT TCA GTC TCA TTC CAA GCC AT                   |
|                           | C-term                    | Forward                            | CGG GAT CCA CAA GAA ACG GCT TTC A                    |
|                           |                           | Reverse                            | GAG AAT TCC AGG TCA GTA TCA AAC CA                   |
| pZEO/Luc or pDHFR         | U-4                       | Forward                            | GCC TCT AGA TGT AAC AGA AGT CAG TAC                  |
|                           |                           | Reverse                            | AG TCT AGA CCA AAC TTA ACA GCA ACA                   |
| Site directed mutagenesis | U6-Aptamer mutant         |                                    | CTA TAG GCA CAC CGG ATG CGC GAA CGA TTG GCT AAG CTTC |
|                           | U-4mut                    |                                    | CAT ACT TGT GAA GCC CCC TAT GTC ACT ACTC             |

**Supplementary Table 2. Binding affinity of  $\beta$ -catenin and HuR on various fragments of COX-2 3'UTR.**

| COX-2 RNA | Protein ( $K_D$ , M)           |                                |
|-----------|--------------------------------|--------------------------------|
|           | HuR                            | $\beta$ -catenin               |
| U-1       | $3.34 \pm 0.01 \times 10^{-8}$ | $1.00 \pm 0.01 \times 10^{-6}$ |
| U-2       | $8.13 \pm 1.58 \times 10^{-8}$ | $1.58 \pm 0.16 \times 10^{-7}$ |
| U-3       | $7.70 \pm 2.83 \times 10^{-6}$ | $2.60 \pm 1.08 \times 10^{-6}$ |
| U-4       | $3.51 \pm 1.42 \times 10^{-6}$ | $1.31 \pm 1.56 \times 10^{-7}$ |
